# Supplementary material
Source: PubMed Central journal article supplement (PMC7099329)
Supplement: bloodBLD2019004218-suppl1.pdf [file bloodBLD2019004218-suppl1.pdf]

## Supplementary Materials

**Supplemental Table S1: Multi-organ dysfunction syndrome (MODS) diagnosis and resolution**

| <b>Organ</b>           | <b>MODS diagnosis*</b>                                                                                                                                                                                           | <b>MODS resolution</b>                                                                                                             |
|------------------------|------------------------------------------------------------------------------------------------------------------------------------------------------------------------------------------------------------------|------------------------------------------------------------------------------------------------------------------------------------|
| Renal                  | ≥50% reduction of Cystatin C GFR from pre-HSCT value. Document the lowest value till completion of TA-TMA targeted therapy                                                                                       | Cyst C GFR of 70 mg/ml or ≥50% increase of Cystatin C GFR from the lowest value during diagnosis of TMA                            |
| Pulmonary              | Any need for positive pressure ventilation (non-invasive or invasive) for ≥24 hours with a PF ratio <300 or SF ratio <264                                                                                        | Resolution of positive pressure ventilation (non-invasive or invasive), resolution of oxygen requirements                          |
| Cardio-vascular        | Pulmonary hypertension (PH) diagnosed by cardiologist using cardiac catheterization or PH criteria on echo (RV pressure ≥50% of systemic pressure, ventricular septal flattening, right ventricular dysfunction) | Resolution of pulmonary hypertension (may receive anti-PH medications if still on maintenance therapy)                             |
| Serositis              | Clinically significant serositis requiring medical therapy (like diuretics) or drainage                                                                                                                          | No evidence of clinically serositis requiring medical therapy or drainage                                                          |
| Hypertension (severe)  | Hypertension requiring continuous antihypertensive medication infusion for ≥12 hours.                                                                                                                            | Hypertension control at <99% for age on no more than 2 medications (not including diuretics)                                       |
| Central nervous system | Seizures attributable to posterior reversible encephalopathy syndrome (PRES)                                                                                                                                     | No uncontrolled seizures (may be on Tx), no active PRES (residual radiologic signs are acceptable without clinical symptomatology) |
| Gastro-intestinal      | GI Bleeding and/or intestinal strictures requiring medical or surgical interventions                                                                                                                             | No active GI bleeding, no evidence of unresolved intestinal strictures (hx of surgical stricture correction is acceptable)         |

*\*MODS is diagnosed if subject has hematologic evidence of TA-TMA and at least another one of the listed organ systems affected*

**Supplemental table S2:** Complement variants identified in tested subjects with TA-TMA#

|    | <b>GENE NAME<br/>(w/ Reference<br/>Sequence)</b>                           | <b>VARIANT<br/>(predicted effect)</b>                                                    | <b>INTERPRETATION</b>                                                                                                                                                                                                         | <b>Status</b> |
|----|----------------------------------------------------------------------------|------------------------------------------------------------------------------------------|-------------------------------------------------------------------------------------------------------------------------------------------------------------------------------------------------------------------------------|---------------|
| 1  | C3<br><i>CFHR3</i>                                                         | c.2203C>T(p.Arg735Trp)<br>c.839_840del(p.Ile280fs)                                       | Likely pathogenic<br>Associated with aHUS when it occurs in the homozygous or compound heterozygous state with another <i>CFHR3</i> mutation                                                                                  | alive         |
| 2  | <i>CFB</i> (NM_001710.5)<br><i>CFHR3</i> (NM_021023.5)                     | c.95G>A(p.R32Q),heterozygous<br>c.786A>T(p.P262P),heterozygous                           | VUCS unable to predict<br>VUCS unable to predict                                                                                                                                                                              | alive         |
| 3  | <i>CFB</i> (NM_001710.5)                                                   | c.95G>A(p.R32Q),heterozygous                                                             | VUCS unable to predict                                                                                                                                                                                                        | alive         |
| 4  | <i>CFHR5</i><br><i>CFHR3/CFHR1</i>                                         | c.486_487insAA(p.E163fs)<br>heterozygous deletion                                        | Frameshift mutations associated with aHUS<br>Unknown if in heterozygous state confers any additional risk for aHUS                                                                                                            | alive         |
| 5  | <i>CFHR3/CFHR1</i><br><i>CFB</i> (NM_001710.5)<br><i>CFH</i> (NM_000186.3) | heterozygous deletion<br>c.95G>A(p.R32Q),heterozygous<br>c.2850G>T(p.Q950H),heterozygous | Unknown if in heterozygous state confers any additional risk for aHUS<br>VUCS unable to predict<br>VUCS unable to predict                                                                                                     | deceased      |
| 6  | <i>THBD</i><br><i>CFHR3/CFHR1</i><br><i>DGKE</i>                           | c.1502C>T(p.P501L)<br>Heterozygous deletion<br>c.966G>A(p.W322*), heterozygous           | Increases the risk of developing aHUS<br>Unknown if in heterozygous state confers any additional risk for aHUS<br>Associated with atypical hemolytic uremic syndrome (aHUS) in the homozygous or compound heterozygous state. | deceased      |
| 7  | <i>CFHR3</i> (NM_021023.5)<br><i>CFHR5</i> (NM_030787.3)                   | c.786A>T(p.P262P), heterozygous<br>c.1067G>A(p.R356H), heterozygous                      | VUCS unable to predict<br>Likely benign                                                                                                                                                                                       | deceased      |
| 8  | <i>CFHR3/CFHR1</i><br><i>CFB</i> (NM_001710.5)                             | Homozygous deletion<br>c.95G>A (p.R32Q),heterozygous                                     | Associated with Factor H auto Ab and an increased risk of aHUS<br>VUCS unable to predict                                                                                                                                      | alive         |
| 9  | <i>CFHR3/CFHR1</i>                                                         | Heterozygous deletion                                                                    | Unknown if in heterozygous state confers any additional risk for aHUS                                                                                                                                                         | deceased      |
| 10 | <i>CFHR3/CFHR1</i>                                                         | Heterozygous deletion                                                                    | Unknown if in heterozygous state confers any additional risk for aHUS                                                                                                                                                         | alive         |
| 11 | <i>CFB</i> (NM_001710.5)<br><i>MCP/CD46</i><br>(NM_002389.4)               | c.559G>A(p.V187I), heterozygous<br>c.1058C>T(p.A353V), heterozygous                      | VUCS unable to predict<br>VUCS unable to predict                                                                                                                                                                              | deceased      |
| 12 | <i>CFHR3/CFHR1</i>                                                         | Heterozygous deletion                                                                    | Unknown if in heterozygous state confers any additional risk for aHUS                                                                                                                                                         | alive         |
| 13 | <i>CFB</i> (NM_001710.5)                                                   | c.1697A>C (p.E566A), heterozygous                                                        | VUCS unable topredict                                                                                                                                                                                                         | alive         |
| 14 | <i>CFB</i> (NM_001710.5)                                                   | c.1697A>C(p.E566A), heterozygous                                                         | VUCS, unable to predict                                                                                                                                                                                                       | alive         |

|    |                                             |                                                          |                                                                                   |          |
|----|---------------------------------------------|----------------------------------------------------------|-----------------------------------------------------------------------------------|----------|
|    | <i>CFHR1</i> (NM_002113.2)<br><i>CFHR3</i>  | c.310C>T(p.H104Y), heterozygous<br>Heterozygous deletion | VUCS, unable to predict<br>The clinical significance of this deletion is unknown. |          |
| 15 | <i>CFHR3/CFHR1</i>                          | Heterozygous deletion                                    | Unknown if in heterozygous state confers any additional risk for aHUS             | alive    |
| 16 | <i>CFHR3/CFHR1</i>                          | Heterozygous deletion                                    | Unknown if in heterozygous state confers any additional risk for aHUS             | deceased |
| 17 | <i>CFHR3/CFHR1</i>                          | Heterozygous deletion                                    | Unknown if in heterozygous state confers any additional risk for aHUS             | deceased |
| 18 | <i>CFB</i> (NM_001710.5)<br>Inheritance: AD | c.1697A>C (p.E566A),heterozygous                         | VUCS-unable to predict                                                            | deceased |
|    | <i>CFH</i> (NM_000186.3)<br>Inheritance: AD | c.3506T>C (p.I1169T),heterozygous                        | VUCS-unable to predict                                                            | deceased |
| 19 | <i>CFHR3/CFHR1</i>                          | Homozygous deletion                                      | Associated with Factor H auto Ab and an increased risk of aHUS                    | deceased |
| 20 | <i>CFHR3/CFHR1</i>                          | Homozygous deletion                                      | Associated with Factor H auto Ab and an increased risk of aHUS                    | deceased |
| 21 | <i>CFHR3/CFHR1</i>                          | Homozygous deletion                                      | Associated with Factor H auto Ab and an increased risk of aHUS                    | alive    |

#Genes sequenced: *C3*, *CFB*, *CFH*, *CFHR1*, *CFHR3*, *CFHR5*, *CFI*, *DGKE*, *MCP*, *THBD*.  
*CFHR3/CFHR1* deletion analysis performed by MLPA.
